# Supplementary material
Source: PubMed Central journal article supplement (PMC9639217)
Supplement: NIHMS1833075-supplement-1833075_SI_Table.pdf [file NIHMS1833075-supplement-1833075_SI_Table.pdf]

## **Supplementary Information**

### **Cryo-EM structure of disease-related prion fibrils provides insights into seeding barriers**

**Qiuye Li, Christopher P. Jaronec, and Witold K. Surewicz**

**Supplementary Table 1: Cryo-EM data collection, refinement and validation statistics**

|                                                  | huPrP23-144 fibrils<br>(EMDB-24514)<br>(PDB 7RL4) | moPrP23-144 fibrils<br>(polymorph 1)<br>(EMDB-27458)<br>(PDB 8DJA) |
|--------------------------------------------------|---------------------------------------------------|--------------------------------------------------------------------|
| <b>Data collection and processing</b>            |                                                   |                                                                    |
| Magnification                                    | 105,000                                           | 105,000                                                            |
| Voltage (kV)                                     | 300                                               | 300                                                                |
| Electron exposure (e-/Å <sup>2</sup> )           | 53                                                | 52                                                                 |
| Defocus range (µm)                               | -0.8 to -1.5                                      | -0.8 to -1.5                                                       |
| Pixel size (Å)                                   | 0.828                                             | 0.828                                                              |
| Symmetry imposed                                 | C2                                                | C2                                                                 |
| Initial particle images (no.)                    | 349,164                                           | 76,825                                                             |
| Final particle images (no.)                      | 46,803                                            | 10,628                                                             |
| Map resolution (Å)                               | 2.86                                              | 3.92                                                               |
| FSC threshold                                    | 0.143                                             | 0.143                                                              |
| Map resolution range (Å)                         | 2.80 to 4.49                                      | 3.90 to 10.63                                                      |
| <b>Refinement</b>                                |                                                   |                                                                    |
| Initial model used (PDB code)                    | De novo                                           | De novo                                                            |
| Model resolution (Å)                             | 3.02                                              | 4.49                                                               |
| FSC threshold                                    | 0.5                                               | 0.5                                                                |
| Map sharpening <i>B</i> factor (Å <sup>2</sup> ) | -82.42                                            | -58.39                                                             |
| Model composition                                |                                                   |                                                                    |
| Non-hydrogen atoms                               | 4,620                                             | 4,600                                                              |
| Protein residues                                 | 680                                               | 680                                                                |
| Ligands                                          | 0                                                 | 0                                                                  |
| <i>B</i> factors (Å <sup>2</sup> )               |                                                   |                                                                    |
| Protein                                          | 88.57                                             | 164.65                                                             |
| R.m.s. deviations                                |                                                   |                                                                    |
| Bond lengths (Å)                                 | 0.015                                             | 0.006                                                              |
| Bond angles (°)                                  | 1.390                                             | 1.080                                                              |
| Validation                                       |                                                   |                                                                    |
| MolProbity score                                 | 2.20                                              | 2.41                                                               |
| Clashscore                                       | 11.94                                             | 24.46                                                              |
| Poor rotamers (%)                                | 0                                                 | 0                                                                  |
| Ramachandran plot                                |                                                   |                                                                    |
| Favored (%)                                      | 87.50                                             | 90.62                                                              |
| Allowed (%)                                      | 12.50                                             | 9.38                                                               |
| Disallowed (%)                                   | 0                                                 | 0                                                                  |
